# Supplementary material for: MRAP deficiency impairs adrenal progenitor cell differentiation and gland zonation
Source: PubMed Central journal article supplement (PMC6181639; doi:10.1096/fj.201701274rr), 2018-06-07

# Supplemental Fig 2

A

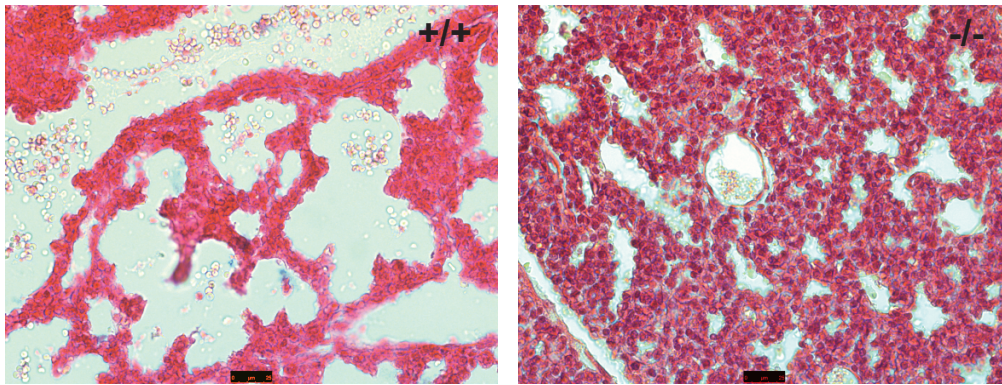

B

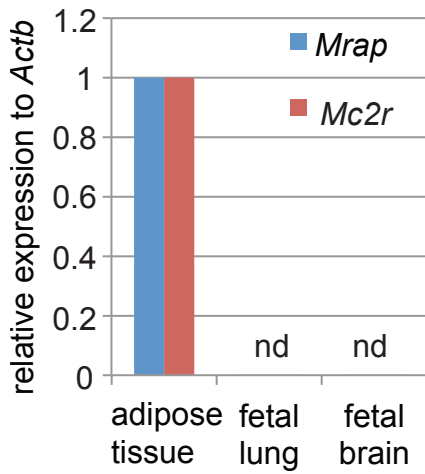

C

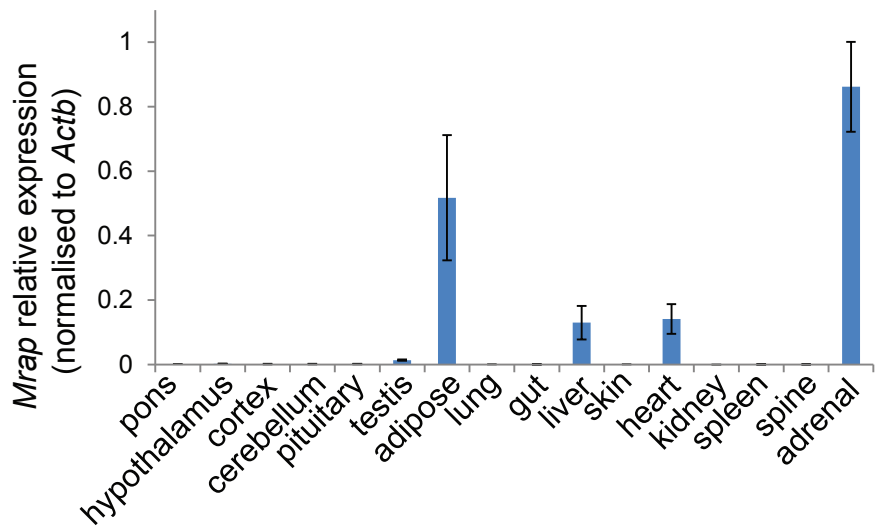

D

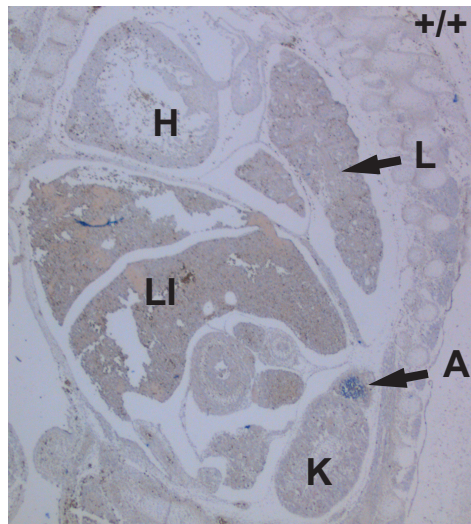

E

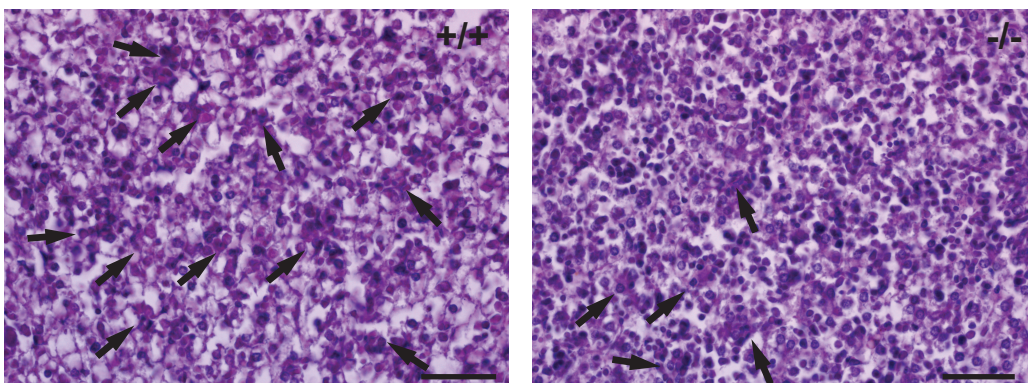

Supplement: fj.201701274RR.sf2.pdf [file fj.201701274RR.sf2.pdf]
